# Supplementary material
Source: PubMed Central journal article supplement (PMC2913474)
Supplement: NIHMS210616-supplement-Supp1.pdf [file NIHMS210616-supplement-Supp1.pdf]

**Isolation of somatic Na<sup>+</sup> currents by selective inactivation of axonal channels  
with a voltage prepulse**

**- Supplemental material -**

Lorin S. Milesco<sup>1,2</sup>, Bruce P. Bean<sup>1</sup>, and Jeffrey C. Smith<sup>2</sup>

<sup>1</sup>Department of Neurobiology, Harvard Medical School, Boston, MA.

<sup>2</sup>Cellular and Systems Neurobiology Section, NINDS, NIH, Bethesda, MD.

| Parameter  | Units | Value         |               |
|------------|-------|---------------|---------------|
|            |       | Current clamp | Voltage clamp |
| $C_m$      | pF    |               | 15            |
| $C_x$      | pF    |               | 1.5           |
| $V_{Na}$   | mV    | 62            | 29            |
| $V_K$      | mV    |               | -80           |
| $V_{Lk}$   | mV    |               | -50           |
| $G_{Na,m}$ | nS/pF |               | 8             |
| $G_{Na,x}$ | nS/pF |               | 100           |
| $G_{K,m}$  | nS/pF | 1             | 0             |
| $G_{K,x}$  | nS/pF | 1             | 0             |
| $G_{Lk,m}$ | nS/pF |               | 0.002         |
| $G_{Lk,x}$ | nS/pF |               | 0.002         |
| $G_{mx}$   | nS    |               | 15            |

**Supplemental Table 1. Compartmental model parameters.** The conductance values for  $Na_v$  and  $K_v$  channels and for the leak are given as densities. Whenever used in the model, they are multiplied by the values of  $C_m$  or  $C_x$ .

| Parameter               | Value              |
|-------------------------|--------------------|
| Na <sub>v</sub> channel |                    |
| $\alpha_{m,0}$          | 5.254              |
| $\alpha_{m,1}$          | 0.01474            |
| $\beta_{m,0}$           | 0.3454             |
| $\beta_{m,1}$           | -0.08526           |
| $\tau$                  | 85.07              |
| $\tau_1$                | 0.005784           |
| $\delta$                | 5.895              |
| $\delta$                | -0.01043           |
| $\gamma'_0$             | 25.45              |
| $\gamma'_1$             | 0.005784           |
| $\delta'_0$             | 26.06              |
| $\delta'_1$             | -0.01043           |
| $\alpha_{h,0}$          | 0.01068            |
| $\alpha_{h,1}$          | -0.04270           |
| $\beta_{h,0}$           | 0.05954            |
| $\beta_{h,1}$           | 0.02803            |
| $\alpha_{ho,0}$         | 0.004182           |
| $\alpha_{ho,1}$         | -0.04270           |
| $\beta_{ho,0}$          | 1.805              |
| $\beta_{ho,1}$          | 0.02803            |
| $a$                     | 0.71098            |
| $b$                     | 8.1799             |
| K <sub>v</sub> channel  |                    |
| $\alpha_n$              | 0.25               |
| $\alpha_n$              | 0.1                |
| $\beta_n$               | $5 \times 10^{-5}$ |
| $\beta_n$               | -0.1               |

**Supplemental Table 2. Ion channel kinetic parameters.** The  $k_0$  parameters (e.g.,  $\alpha_{m,0}$ ) are in  $\text{ms}^{-1}$ , the  $k_1$  parameters (e.g.,  $\alpha_{m,1}$ ) are in  $\text{mV}^{-1}$ , and the  $a$  and  $b$  parameters are adimensional.

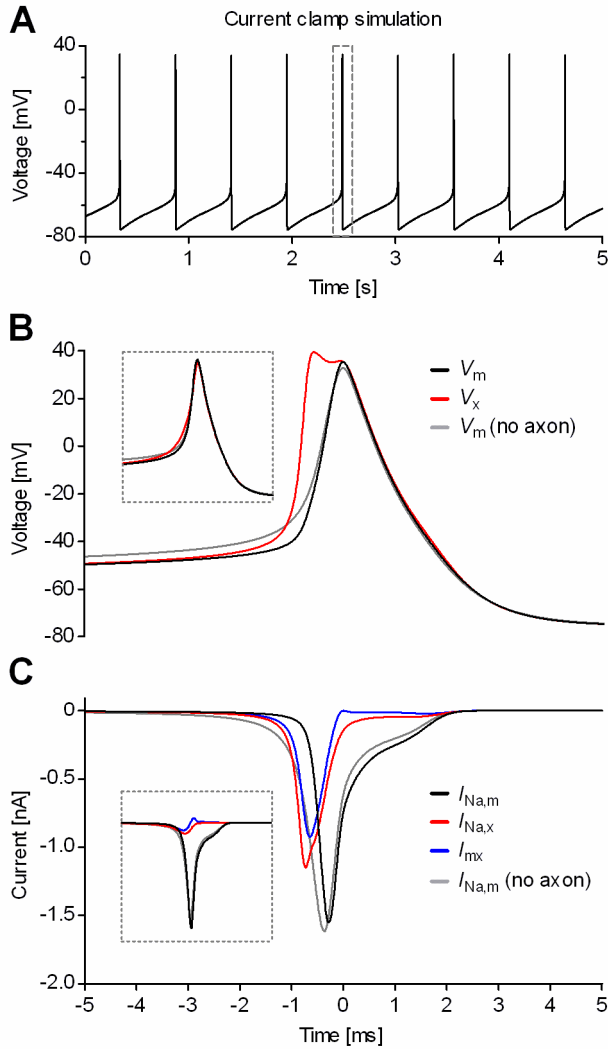

### Supplemental Figure 1. Compartmental model dynamics.

**A**, The compartmental model was tuned to spike spontaneously at  $\approx 2$  Hz, similar to raphé neurons. **B** & **C**, A detailed view of one action potential. The axonal voltage  $V_x$  rises faster than the somatic voltage  $V_m$ , due to the greater density of axonal  $Na_v$  channels ( $G_{Na,x}$ ). The difference between  $V_x$  and  $V_m$  causes depolarizing axial current  $I_{mx}$  to flow into the soma, together with somatic  $Na^+$  current  $I_{Na,m}$ . As a result, the action potential rises more abruptly than in the soma-only case (gray traces). The insets in **(B)** and **(C)** correspond to a simulation where  $G_{Na,x} \approx G_{Na,m}$ , and the voltage sensitivity of axonal  $Na_v$  channels was 10 mV more negative.
